# Supplementary material for: Chloroplast phylogenomics and the dynamic evolution of Santalum (Santalaceae)
Source: Research Square preprint supplement (doi:10.21203/rs.3.rs-154608/v1), 2021-02-08
Supplement: Supplementary file 1 [file 0f2c927b81ccb38cad5fcfff.xlsx]

## Sheet: Sheet1
Table S3. Numbers of nucleotide substitutions and sequence distance in Santalum complete chloroplast genomes. The upper triangle indicates the number of nucleotide substitutions, and the lower triangle indicates the number of sequence distances in complete chloroplast genomes.
	S. acuminatum	S. album	S. boninense	S. ellipticum	S. ellipticum var. littorale	S. freycinetianum var. pyrularium	S. leptocladum	S. paniculatum	S.sp.	S. spicatum	S. yasi
S. acuminatum		956	891	902	909	924	935	907	935	1090	987
S. album	0.00671296		317	327	332	429	438	323	445	1151	418
S. boninense	0.00624741	0.00220338		60	69	352	368	64	368	1082	353
S. ellipticum	0.00632592	0.00227323	0.000416103		43	362	378	38	378	1095	361
S. ellipticum var. littorale	0.00637506	0.00230865	0.000478542	0.000298247		370	387	43	387	1101	368
S. freycinetianum var. pyrularium	0.00649364	0.00298761	0.00245004	0.00252014	0.00257549		109	364	109	1109	461
S. leptocladum	0.00656869	0.00304971	0.00256086	0.00263099	0.0026933	0.00075775		380	129	1123	476
S. paniculatum	0.0063617	0.00224616	0.000443877	0.00026358	0.000298236	0.00253447	0.00264502		380	1097	364
S.sp.	0.00656869	0.00309914	0.00256086	0.00263099	0.0026933	0.00075775	0.000897423	0.00264502		1123	476
S. spicatum	0.00767963	0.0080609	0.00756733	0.00765965	0.00770092	0.00777296	0.00786872	0.00767417	0.00786872		1183
S. yasi	0.00692889	0.00290914	0.00245389	0.00250987	0.00255861	0.00321236	0.00331617	0.00253149	0.00331617	0.00828286
